# Supplementary material
Source: Springer Nature journal article supplement (https://www.springermedizin.de/resource/supplementary/12985_2010_920_MOESM6_ESM.pdf/9608746)

**A****AdCMV-CD40L MOI 1.1 / M000301**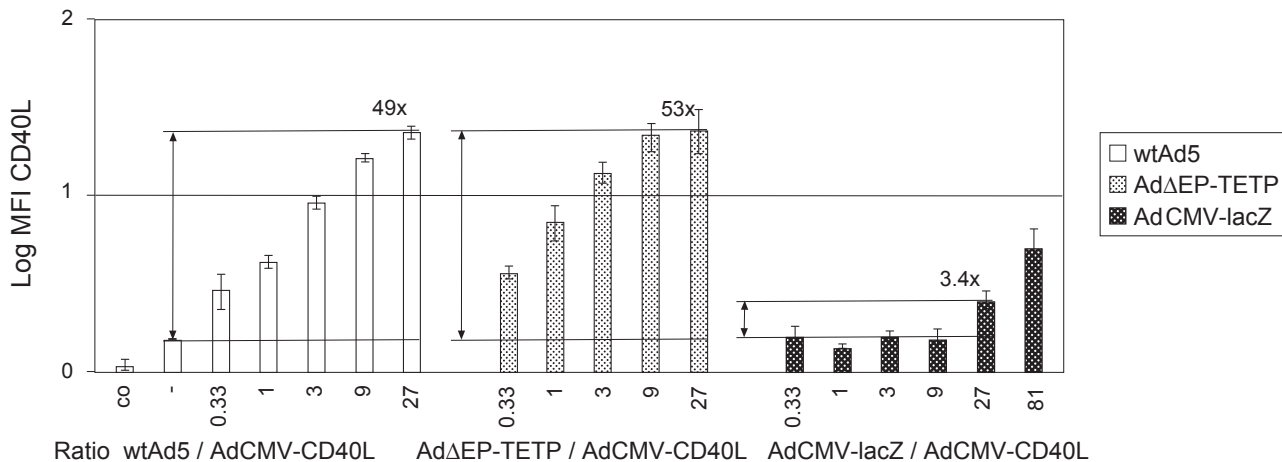**B****AdCMV-CD40L MOI 1.1 / SW480**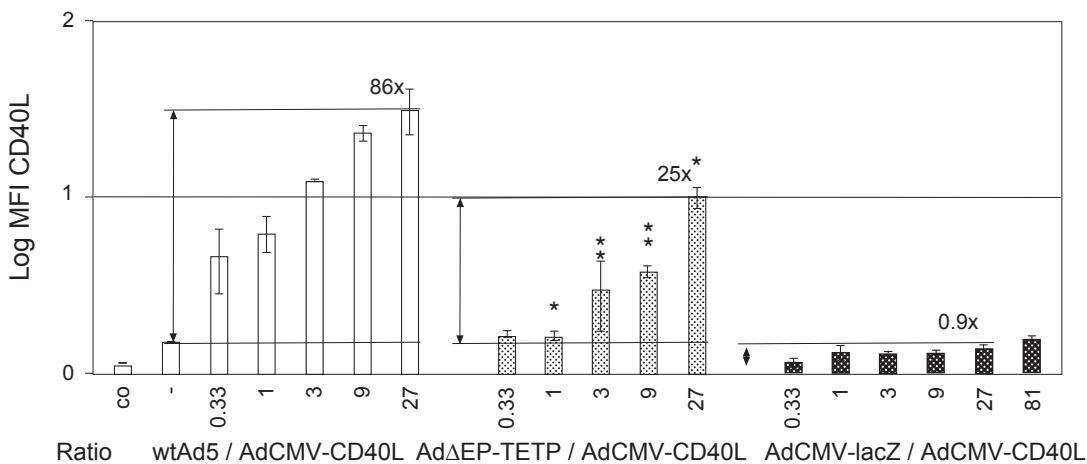**C****AdCMV-IL-2 MOI 1.1 / M000301**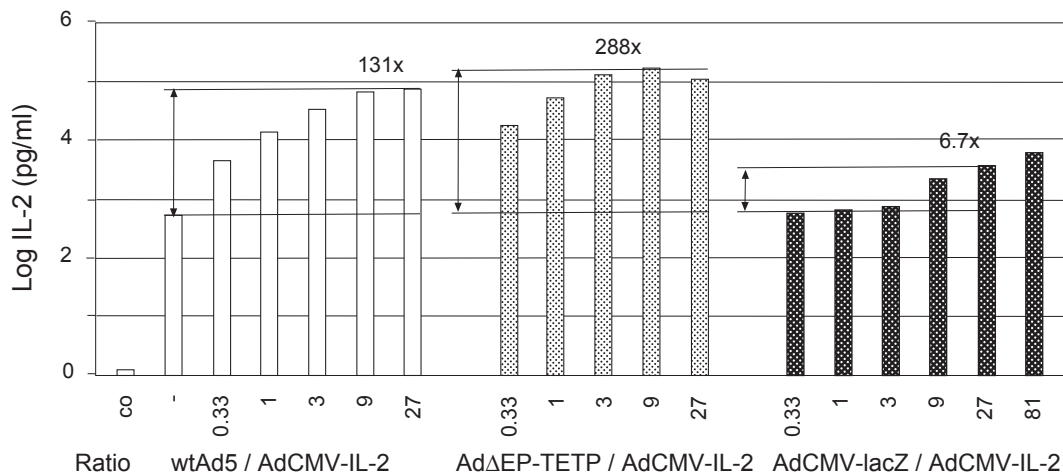

Supplement: MOESM6 [file 9608746]
